# Supplementary material for: Image-Guided Radiotherapy Using a Modified Industrial Micro-CT for Preclinical Applications
Source: PubMed Central journal article supplement (PMC4438006; doi:10.1371/journal.pone.0126246), 2015-05-19
Supplement: pone.0126246.s001.pdf [file pone.0126246.s001.pdf]

## S1 Text

**Calibration of the Gafchromic EBT3 films.** Gafchromic EBT3 films (ISP, Wayne, NJ, USA) were calibrated using the information of the red color channel [1,2]. Scanning was performed after 12 h post irradiation to prevent uncertainties due to the self-developing effect of the films [1,2]. The dependence of the red color channel levels for the calibration curve (CC) on dose  $D$  were fitted to the data using a nonlinear least squares algorithm and Eq. (1) with fitting parameters  $a$ ,  $b$ , and  $c$ :

$$CC = a \cdot \log(b + D) + c \quad (1)$$

## References

1. Micke A, Lewis DF, Yu X. Multichannel film dosimetry with nonuniformity correction. *Med Phys* 2011;38:2523-2534.
2. Schneider F, Polednik M, Wolff D, Steil V, Delana A, Wenz F, Menegotti L. Optimization of the Gafchromic™ EBT protocol for IMRT QA. *Z Med Phys* 2009;19:29-37.
