# Supplementary material for: Image-Guided Radiotherapy Using a Modified Industrial Micro-CT for Preclinical Applications
Source: PubMed Central journal article supplement (PMC4438006; doi:10.1371/journal.pone.0126246), 2015-05-19
Supplement: pone.0126246.s002.pdf [file pone.0126246.s002.pdf]

## S2 Text

### Full width at half maximum (FWHM), flatness, symmetry and penumbra.

The analysis was performed following the guideline of the AAPM protocol TG-45 [1]. All beam profiles were normalized to the dose maximum and the FWHM was defined as the distance between the 50 % dose points. The flatness is defined along 80 % of the cross-section area and gives its maximum dose variation, according to

$$Flatness = \frac{D_{max} - D_{min}}{D_{max} + D_{min}} \quad (1)$$

The deviation of the “left-side” dose and the “right-side” dose at 80 % of the FWHM points describes the symmetry of a field

$$Symmetry = \max(|D(x) - D(-x)|) \quad (2)$$

The width of the penumbra is defined between 80 % and 20 % of the maximum dose as the lateral distance on both sides of the beam profile.

FWHM, flatness, symmetry and penumbra were determined for angles of 0°, 45°, 90° and 135°. Mean and standard deviations were calculated.

## References

1. Nath R, Biggs PJ, Bova FJ, Ling CC, Purdy JA, van de Geijn J, Weinhaus MS. AAPM code of practice for radiotherapy accelerators: Report of AAPM Radiation Therapy Task Group No. 45. *Med Phys* 1994;21:1093-1121.
