# Supplementary material for: Image-Guided Radiotherapy Using a Modified Industrial Micro-CT for Preclinical Applications
Source: PubMed Central journal article supplement (PMC4438006; doi:10.1371/journal.pone.0126246), 2015-05-19
Supplement: pone.0126246.s003.pdf [file pone.0126246.s003.pdf]

### S3 Text

#### Depth Dose Rate Interpolation.

The dose rate  $\dot{D}_{calc}$  can be interpolated by fitting Eq. (1) to the measured data using a nonlinear least squares algorithm:

$$\dot{D}_{calc} = \frac{A}{(D + d)^2} \cdot \exp(-\mu(d) \cdot d) \quad (1)$$

with the entrance dose rate  $A$ , the known distance  $D = 72mm$  of the source to the surface of the solid water slabs, the depth  $d$  in tissue (simulated by solid water slabs) and the effective attenuation coefficient  $\mu(d)$

$$\mu(d) = \frac{C \cdot \mu_0 + d \cdot \mu_1}{(C + d)} \quad (2)$$

The change of the effective attenuation coefficient is described by a fit parameter  $C$  which governs the transition of the effective attenuation coefficient from a (fitted) initial effective attenuation coefficient  $\mu_0$  to the known attenuation coefficient of  $\mu_1 = 0.015052 / \text{mm}$  for infinite depth  $d$ , when only the 150 keV photons contribute due to beam hardening.

Note that during fitting the parameters  $\mu_0$  and  $C$  were shared for all collimator aperture sizes, i.e. only the output factors  $A$  were different between the different collimators. Least squares fit was performed using GraphPad Prism (Version 6.05 for Windows, GraphPad Software, La Jolla California USA).
